# Supplementary material
Source: PubMed Central journal article supplement (PMC8314653)
Supplement: jcsm.9150.ds001.pdf [file jcsm.9150.ds001.pdf]

**Table S1—Change From Baseline for Percentage of Sleep Stages per TST (FAS).**

| <b>Mean (SD), % of Sleep Stage per TST</b> | <b>PBO<br/>(N = 208)</b> | <b>ZOL<br/>(N = 263)</b> | <b>LEM5<br/>(N = 266)</b> | <b>LEM10<br/>(N = 269)</b> |
|--------------------------------------------|--------------------------|--------------------------|---------------------------|----------------------------|
| <b>Nights 1/2<sup>a</sup></b>              |                          |                          |                           |                            |
| Total NREM                                 | -0.3 (4.5)               | 1.1 (6.1)                | -1.8 (5.0)                | -4.2 (5.3)                 |
| N1                                         | 0.0 (3.5)                | -1.6 (4.2)               | -0.8 (4.0)                | -1.8 (4.8)                 |
| N2                                         | -0.2 (6.8)               | 2.5 (7.1)                | 0.0 (6.2)                 | -1.2 (7.3)                 |
| N3                                         | -0.1 (5.5)               | -0.1 (5.4)               | -1.0 (5.6)                | -1.3 (4.7)                 |
| Stage R                                    | 0.3 (4.5)                | -1.1 (6.1)               | 1.8 (5.0)                 | 4.2 (5.3)                  |
| <b>Nights 29/30<sup>b</sup></b>            |                          |                          |                           |                            |
| Total NREM                                 | 0.4 (5.3)                | 0.8 (5.6)                | -0.7 (5.4)                | -2.3 (5.5)                 |
| N1                                         | -0.5 (3.9)               | -1.1 (4.2)               | -0.1 (3.6)                | -0.4 (6.1)                 |
| N2                                         | 1.3 (7.5)                | 3.7 (7.7)                | 1.1 (6.4)                 | -0.2 (7.8)                 |
| N3                                         | -0.3 (6.1)               | -1.8 (5.7)               | -1.7 (5.4)                | -1.7 (5.5)                 |
| Stage R                                    | -0.4 (5.3)               | -0.8 (5.6)               | 0.7 (5.4)                 | 2.3 (5.5)                  |

Values are presented as mean (SD), %.

<sup>a</sup>PBO, n = 208; ZOL, n = 262; LEM5, n = 266; LEM10, n = 269. <sup>b</sup>PBO, n = 200; ZOL, n = 250; LEM5, n = 260; LEM10, n = 260. Percentage of sleep stages are per TST. FAS = full analysis set, LEM5 = lemborexant 5 mg, LEM10 = lemborexant 10 mg, NREM = nonrapid eye movement sleep, Stage R= rapid eye movement, PBO = placebo, SD = standard deviation, TST = total sleep time, ZOL = zolpidem tartrate extended release 6.25 mg.
